# Supplementary material for: Boosting photocatalytic hydrogen production activity by a microporous CuII-MOF nanoribbon decorated with Pt nanoparticles
Source: Royal Society of Chemistry journal article supplement (doi:10.1039/d1qi00516b), 2021-01-01
Supplement: d1qi00516b1.pdf [file d1qi00516b1.pdf]

ESI

**Boosting photocatalytic hydrogen production activity by microporous Cu<sup>II</sup>-MOF nanoribbon decorated  
with Pt nanoparticles**

Lei Li,<sup>a, b</sup> Yan Zhao,<sup>a, b</sup> Qian Wang,<sup>a</sup> Zheng-Yu Liu,<sup>a</sup> Xiu-Guang Wang,<sup>a</sup> En-Cui Yang,<sup>\*a</sup> and Xiao-Jun Zhao<sup>\*a, b</sup>

<sup>a</sup> *College of Chemistry, Key Laboratory of Inorganic-Organic Hybrid Functional Material Chemistry, Ministry of Education, Tianjin Key Laboratory of Structure and Performance for Functional Molecules, Tianjin Normal University, Tianjin 300387, People's Republic of China*

<sup>b</sup> *Department of Chemistry, Collaborative Innovation Center of Chemical Science and Engineering, Nankai University, Tianjin 300071, People's Republic of China*

**Materials and characterizations**

All raw materials were commercially purchased from either J&K Scientific or Tianjin Chemical Reagent Factory and used as received without further purification. Doubly deionized water was used during the conventional synthesis. HL was prepared according to the literature.<sup>1</sup> Elemental analyses for C, H and N were carried out with a CE-440 (Leeman-Labs) analyzer. Fourier transform (FT) IR spectra (KBr pellets) were taken on an Avatar-370 (Nicolet) spectrometer in the range 4000–400 cm<sup>-1</sup>. Thermogravimetric analysis (TGA) experiments were performed on a Shimadzu simultaneous DTG-60A compositional analysis instrument from room temperature to 800 °C under N<sub>2</sub> atmosphere at a heating rate of 5 °C min<sup>-1</sup>. Powder X-ray diffraction (PXRD) patterns were obtained from a Bruker D8 ADVANCE diffractometer at 40 kV and 40 mA for Cu K $\alpha$  radiation ( $\lambda = 1.5406 \text{ \AA}$ ), with a scan speed of 0.1 sec/step and a step size of 0.01° in  $2\theta$ . The simulated PXRD pattern was calculated using single-crystal X-ray diffraction data and

processed by the free Mercury v1.4 program provided by the Cambridge Crystallographic Data Center. The X-ray photoelectron spectroscopy (XPS) measurement was carried out on an AXIS Ultra DLD X-ray photoelectron spectroscopy (Shimadzu, Japan). The scanning electron microscope (SEM) characterizations were performed by a field-emission scanning electron microscope (SEM, FEI NOVA Nano SEM 230) with energy dispersive spectroscope (EDS). UV-vis diffuse reflectance spectra (DRS) were carried out on a U-4100 UV-vis spectrophotometer (HITACHI) equipped with an integrating sphere assembly. Fluorescence spectra were recorded in aqueous solution with a Cary Eclipse fluorescence spectrophotometer (Varian) at room temperature. Electron spin resonance (ESR) spectra were measured in tert-butanol with EDTA as trapping agent on an electron paramagnetic resonance spectrometer (ER200-SRC-10/12). The weight percentage of Pt in the resulting product was determined by inductively coupled plasma mass spectrometer (ICP-MS, iCAP RQ). Transmission electron microscopy (TEM) images, high-resolution transmission electron microscopy (HRTEM) and EDS elemental mapping were obtained by a TecnaiG2 F20 transmission electron microscopy at 200 kV. The Mott-Schottky plots were measured in 0.2 M Na<sub>2</sub>SO<sub>4</sub> aqueous solution (pH = 10) adjusted by NaOH (1.0 M) aqueous solution with an AMETEK Princeton Applied Research (Versa STAT 4) electrochemical workstation using photocatalyst/FTO combination as the working electrode, a platinum foil as the counter electrode, and a saturated Ag/AgCl as the reference electrode. The working electrode photocatalyst/FTO was prepared by dropping 50  $\mu$ L of sample suspension containing containing photocatalyst (3.0 mg), ethanol (1.0 mL) and Nafion (20.0  $\mu$ L) directly onto a FTO plate. The surface area of the working electrode exposed to the electrolyte was about 1.0 cm<sup>2</sup>. The electrochemical impedance spectroscopy (EIS) of crystalline Cu<sup>II</sup>-MOF and Pt/Cu<sup>II</sup>-MOF composites were carried out in 0.2 M Na<sub>2</sub>SO<sub>4</sub> aqueous solution (pH = 10) with a bias of 2.0 V.

**Table S1** Crystal and structure refinement data for **Cu<sup>II</sup>-MOF<sup>a</sup>**

| <b>Cu<sup>II</sup>-MOF<sup>2</sup></b>                                                                 |                                                                 |
|--------------------------------------------------------------------------------------------------------|-----------------------------------------------------------------|
| empirical formula                                                                                      | C <sub>29</sub> H <sub>19</sub> CuN <sub>3</sub> O <sub>5</sub> |
| <i>F</i> <sub>w</sub>                                                                                  | 553.01                                                          |
| cryst size [mm]                                                                                        | 0.22 × 0.21 × 0.18                                              |
| cryst syst                                                                                             | Orthorhombic                                                    |
| space group                                                                                            | <i>P</i> 2 <sub>1</sub> 2 <sub>1</sub> 2 <sub>1</sub>           |
| <i>a</i> [Å]                                                                                           | 6.2062(4)                                                       |
| <i>b</i> [Å]                                                                                           | 19.1198(12)                                                     |
| <i>c</i> [Å]                                                                                           | 25.5158(17)                                                     |
| <i>V</i> [Å <sup>3</sup> ]                                                                             | 3027.7(3)                                                       |
| <i>Z</i> , <i>D</i> <sub>c</sub> [g cm <sup>-3</sup> ]                                                 | 4, 1.213                                                        |
| <i>h</i> / <i>k</i> / <i>l</i>                                                                         | − 5, 7 / − 24, 22 / − 30, 32                                    |
| <i>F</i> (000)                                                                                         | 1132                                                            |
| <i>μ</i> [mm <sup>-1</sup> ]                                                                           | 0.759                                                           |
| reflections collected/ unique                                                                          | 19906 / 6280                                                    |
| <i>R</i> <sub>int</sub>                                                                                | 0.0439                                                          |
| data / restraints / params                                                                             | 6280 / 0 / 344                                                  |
| <i>R</i> <sub>1</sub> <sup>a</sup> , <i>wR</i> <sub>2</sub> <sup>b</sup> [ <i>I</i> > 2σ ( <i>I</i> )] | 0.0397, 0.0920                                                  |
| <i>R</i> <sub>1</sub> , <i>wR</i> <sub>2</sub> [all data]                                              | 0.0449, 0.0948                                                  |
| Max. and min. transmission                                                                             | 0.875 and 0.851                                                 |
| GOF on <i>F</i> <sup>2</sup>                                                                           | 1.050                                                           |
| Δ <i>ρ</i> <sub>max</sub> , Δ <i>ρ</i> <sub>min</sub> [e·Å <sup>-3</sup> ]                             | 0.374 / − 0.348                                                 |

<sup>a</sup>  $R_1 = \Sigma(|F_o| - |F_c|) / \Sigma|F_o|$ ; <sup>b</sup>  $wR_2 = [\Sigma w(|F_o|^2 - |F_c|^2)^2 / \Sigma w(F_o^2)^2]^{1/2}$ .

**Table S2** Selected bond lengths (Å) and angles (deg) for **Cu<sup>II</sup>-MOF**<sup>a</sup>

|                                              |            |                               |           |
|----------------------------------------------|------------|-------------------------------|-----------|
| Cu(1)–O(1)                                   | 1.996(3)   | Cu(1)–N(1)                    | 2.021(3)  |
| Cu(1)–O(4) <sup>#1</sup>                     | 1.918(2)   | Cu(1)–N(3) <sup>#2</sup>      | 1.999(3)  |
| Cu(1)–O(2)                                   | 2.407(3)   |                               |           |
| O(4) <sup>#1</sup> –Cu(1)–N(3) <sup>#2</sup> | 93.22(12)  | O(1)–Cu(1)–N(3) <sup>#2</sup> | 91.71(12) |
| O(4) <sup>#1</sup> –Cu(1)–N(1)               | 91.70(12)  | O(1)–Cu(1)–N(1)               | 87.49(13) |
| O(4) <sup>#1</sup> –Cu(1)–O(2)               | 105.80(11) | O(1)–Cu(1)–O(2)               | 58.72(11) |
| N(3) <sup>#2</sup> –Cu(1)–O(2)               | 100.93(14) | N(1)–Cu(1)–O(2)               | 92.15(14) |

<sup>a</sup> Symmetry codes: <sup>#1</sup>  $-x, y - 1/2, 3/2 - z$ , <sup>#2</sup>  $1/2 - x, 1 - y, z + 1/2$ .

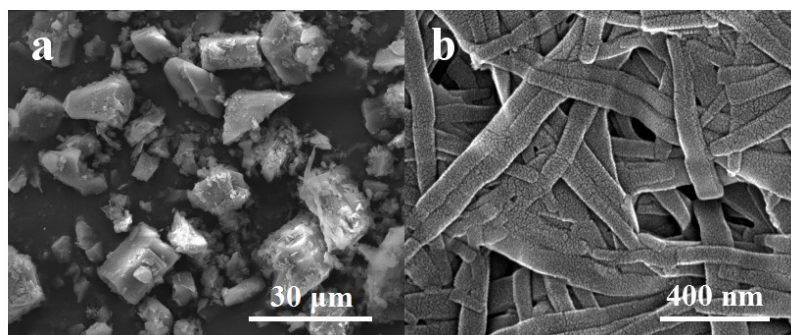

**Fig. S1.** (a) SEM image of  $\text{Cu}^{\text{II}}$ -MOF obtained from mixed  $\text{H}_2\text{O}$ - $\text{CH}_3\text{OH}$  solution. (b) SEM image of  $\text{Cu}^{\text{II}}$ -MOF obtained from acidic  $\text{H}_2\text{O}$ - $\text{CH}_3\text{OH}$  solution adjusted by 1.0 M HCl aqueous solution (pH = 3.28).

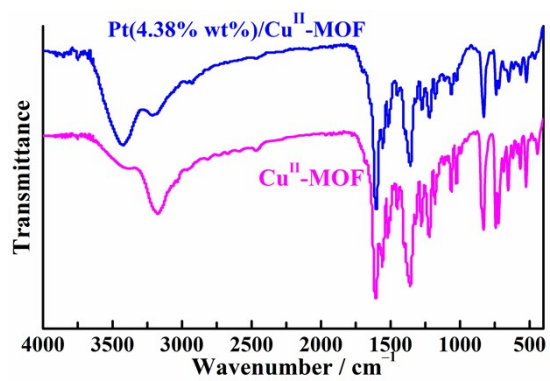

**Fig. S2.** FT-IR spectra of Cu<sup>II</sup>-MOF and Pt(4.38 wt%)/Cu<sup>II</sup>-MOF.

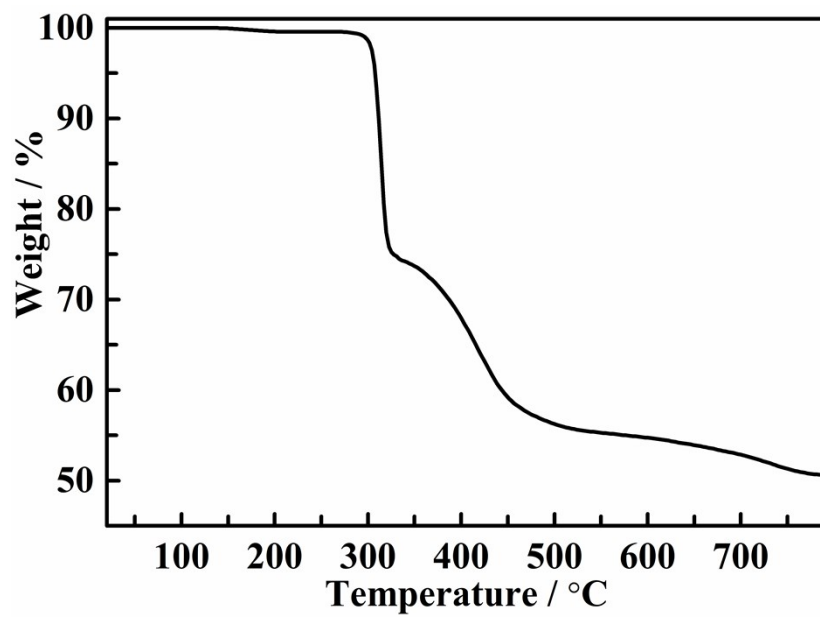

**Fig. S3.** TG curve for Cu<sup>II</sup>-MOF.

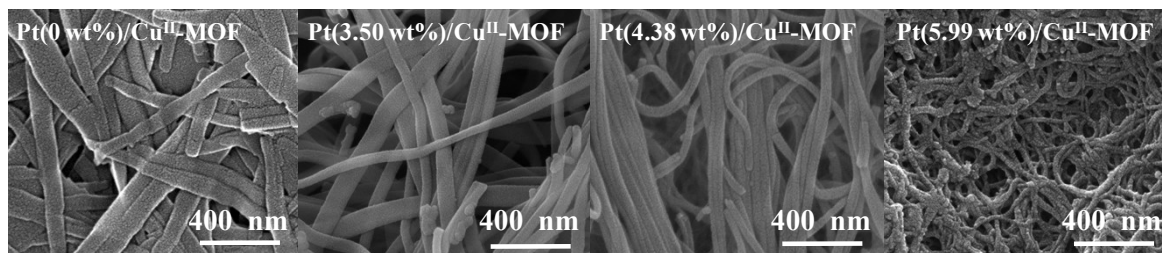

**Fig. S4.** SEM images of Pt/Cu<sup>II</sup>-MOF composites with different Pt loadings.



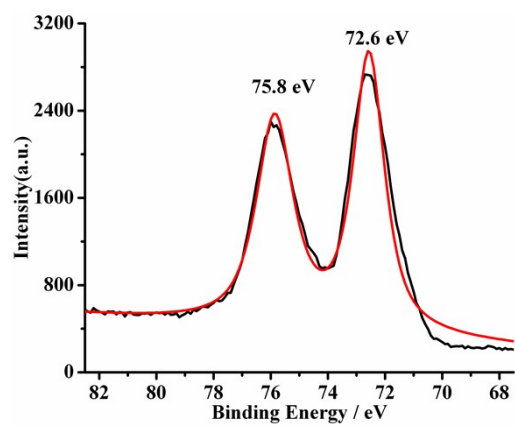

**Fig. S5.** Pt 4f XPS spectrum for **Pt(4.38 wt%)/Cu<sup>II</sup>-MOF**.

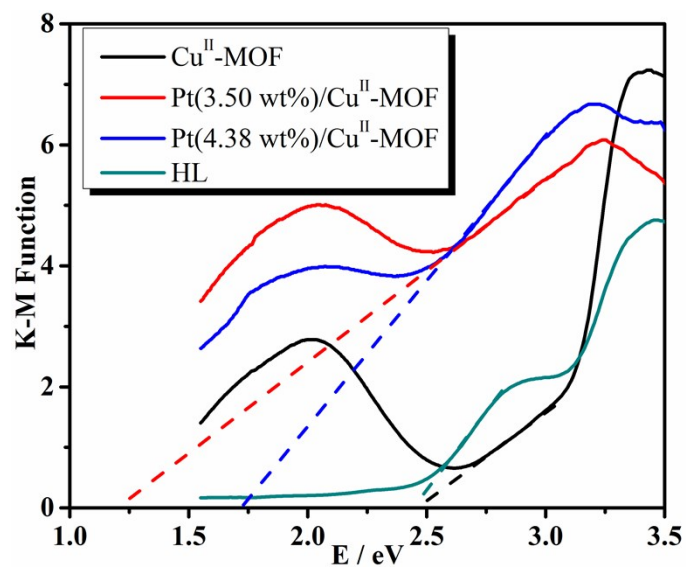

**Fig. S6.** Plots of K-M function vs. energy for **Cu<sup>II</sup>-MOF**, **Pt/Cu<sup>II</sup>-MOF** composites and HL ligand.

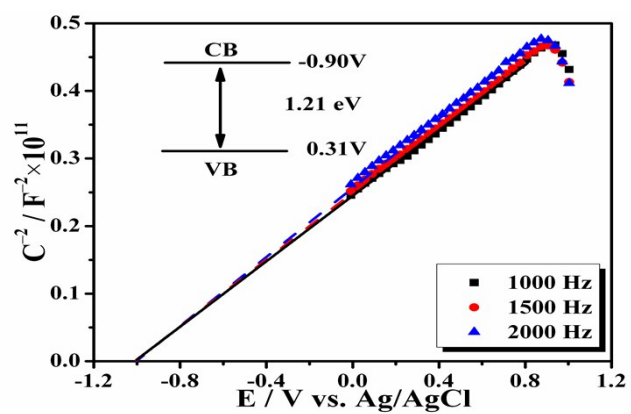

**Fig. S7.** Mott-Schottky plot of Pt(3.50 wt%)/Cu<sup>II</sup>-MOF in 0.2 M Na<sub>2</sub>SO<sub>4</sub> aqueous solution with pH = 10 (Inset: energy band alignment diagram for Pt(3.50 wt%)/Cu<sup>II</sup>-MOF).

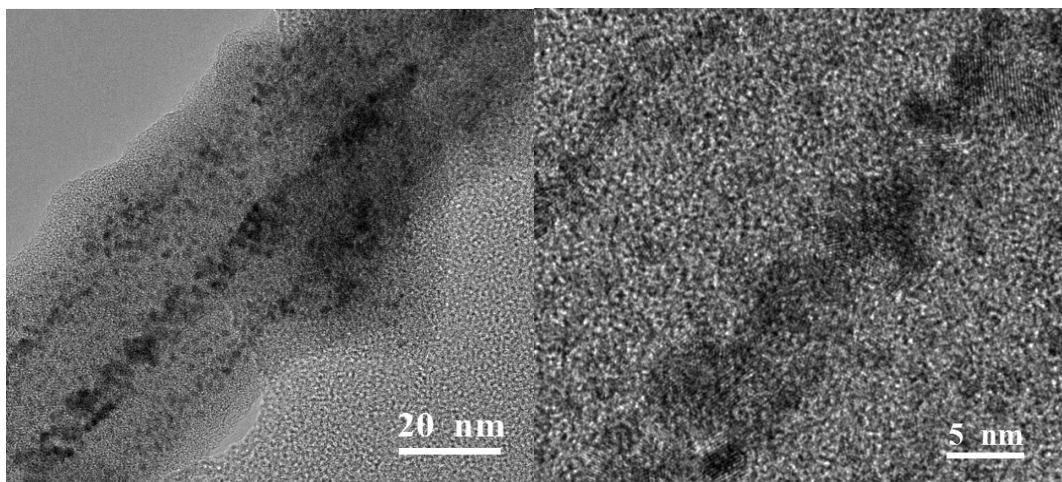

**Fig. S8.** HR-TEM images of Pt(5.99 wt%)/Cu<sup>II</sup>-MOF after photocatalysis.

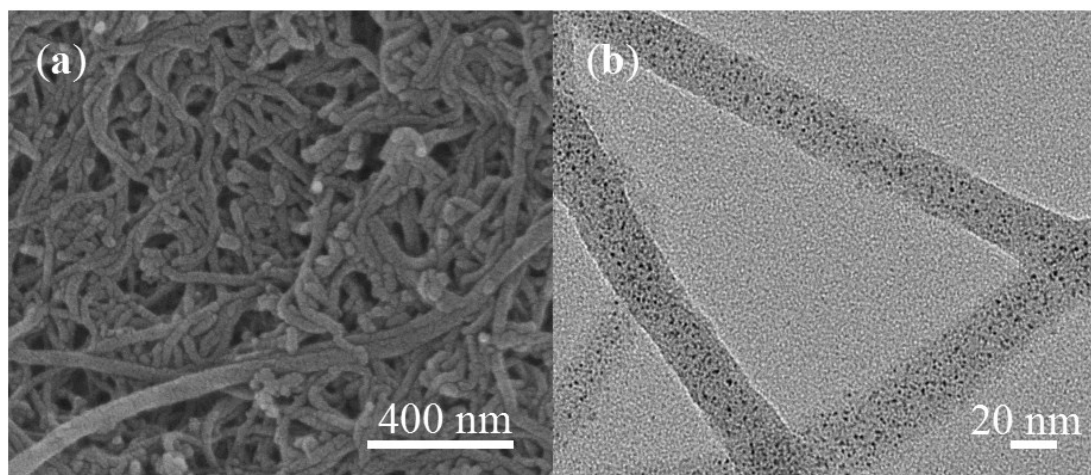

**Fig. S9.** SEM and TEM images of Pt(4.38 wt%)/Cu<sup>II</sup>-MOF after photocatalysis.

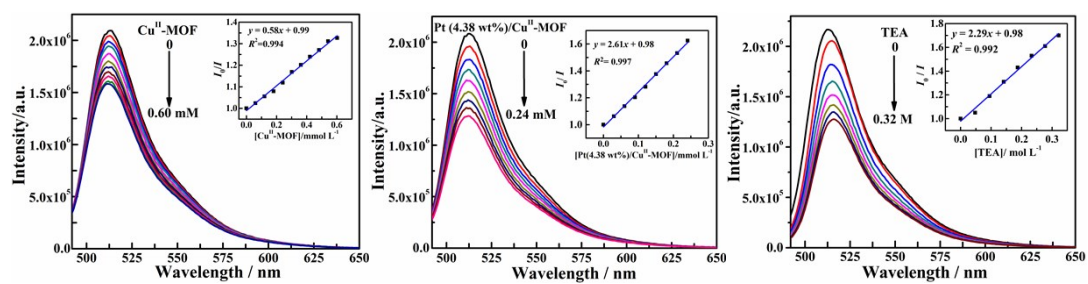

**Fig. S10.** Emission quenching plots of FI by **Cu<sup>II</sup>-MOF** (left), **Pt(4.38 wt%)/Cu<sup>II</sup>-MOF** (middle) and **TEA** (right) in aqueous solution (Inset: Stern-Volmer fits for the luminescence quenching of FI by **Cu<sup>II</sup>-MOF**, **Pt(4.38 wt%)/Cu<sup>II</sup>-MOF** and **TEA**).

## Reference

- 1 Y. M. Klein, E. C. Constable, C. E. Housecroft, J. A. Zampese and A. Crochet, *CrystEngComm*, 2014, **16**, 9915–9929.
- 2 En-Cui Yang, CCDC 1831465: CSD communication, 2018, DOI: 10.5517/ccdc.csd.cc1zgsjr.
